# Supplementary material for: Laser induced ion migration in all-inorganic mixed halide perovskite micro-platelets
Source: Royal Society of Chemistry journal article supplement (doi:10.1039/c9na00565j), 2019-01-01
Supplement: c9na00565j1.pdf [file c9na00565j1.pdf]

## **Supporting Information**

### **Laser induced ion migration in all-inorganic mixed halide perovskite micro-platelet**

Ziming Wang, <sup>a</sup> Yue Wang, <sup>\*a</sup> Zhonghui Nie <sup>a</sup>, Yinjuan Ren <sup>b</sup> and Haibo Zeng <sup>\*a</sup>

<sup>a</sup> MIIT Key Laboratory of Advanced Display Materials and Devices, Institute of Optoelectronics & Nanomaterials, College of Materials Science and Engineering, Nanjing University of Science and Technology, Nanjing 210094, China

<sup>b</sup> Department of Chemistry, National University of Singapore, 3 Science Drive 3, Singapore 117543, Singapore

\* Authors to whom correspondence should be addressed, electronic email:  
[ywang@njust.edu.cn](mailto:ywang@njust.edu.cn); [zeng.haibo@njust.edu.cn](mailto:zeng.haibo@njust.edu.cn)

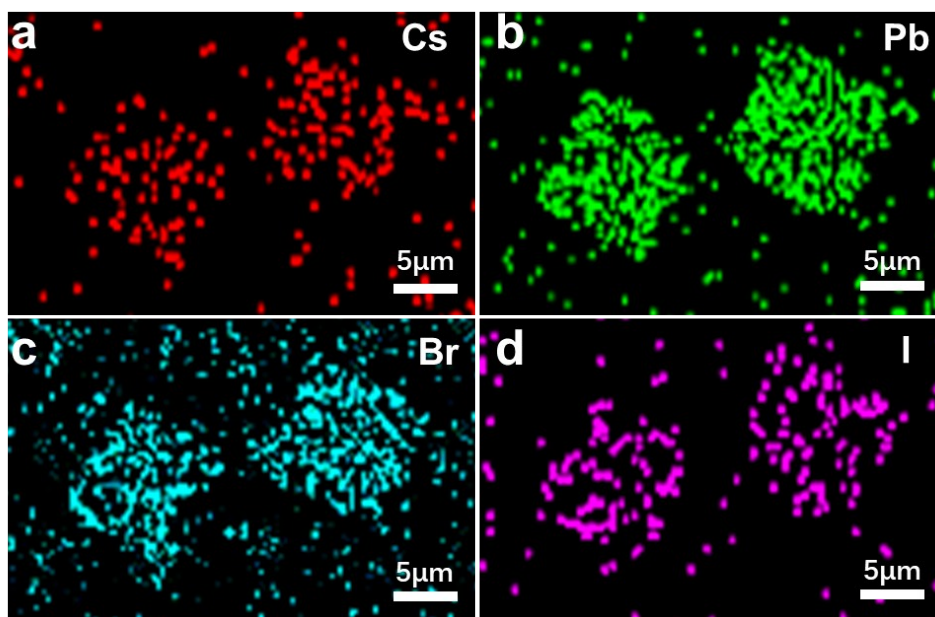

Figure S1. EDX mapping of two  $\text{CsPbBr}_x\text{I}_{(3-x)}$  micro-platelets. (a-d) Distribution of caesium (Cs), lead (Pb), bromine (Br) and iodine (I) elements in perovskites, respectively.

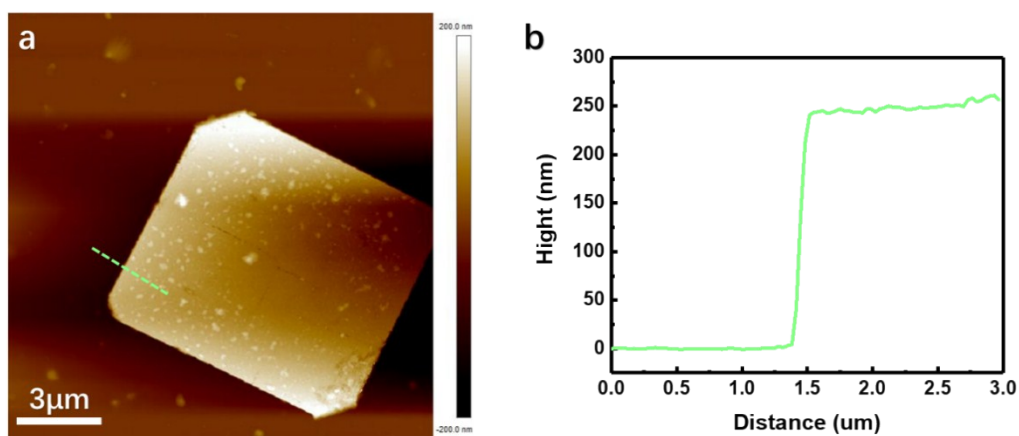

Figure S2. (a) AFM measurement of CsPbBr<sub>x</sub>I<sub>(3-x)</sub> micro-platelet. (b) Test result of the green dotted line in (a).

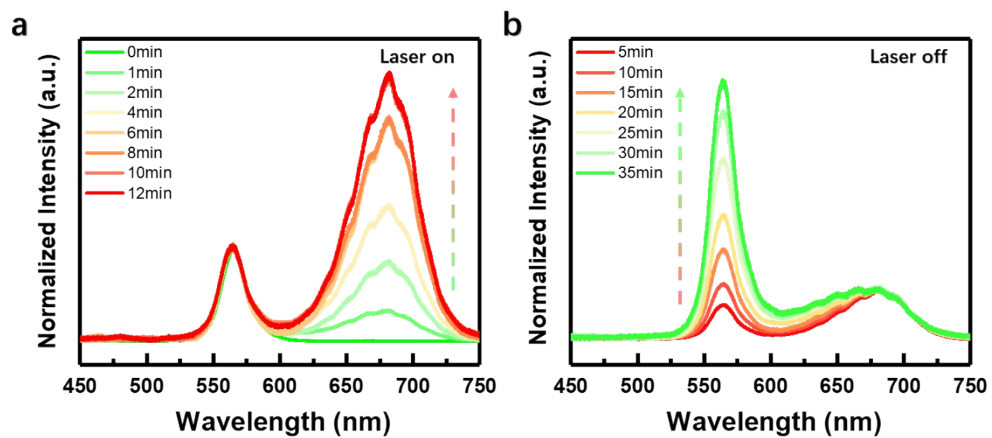

Figure S3. (a) Normalized PL spectra based on the luminescence peak of the bromine-rich phase. (b) Normalized PL spectra based on the luminescence peak of the iodine-rich phase.

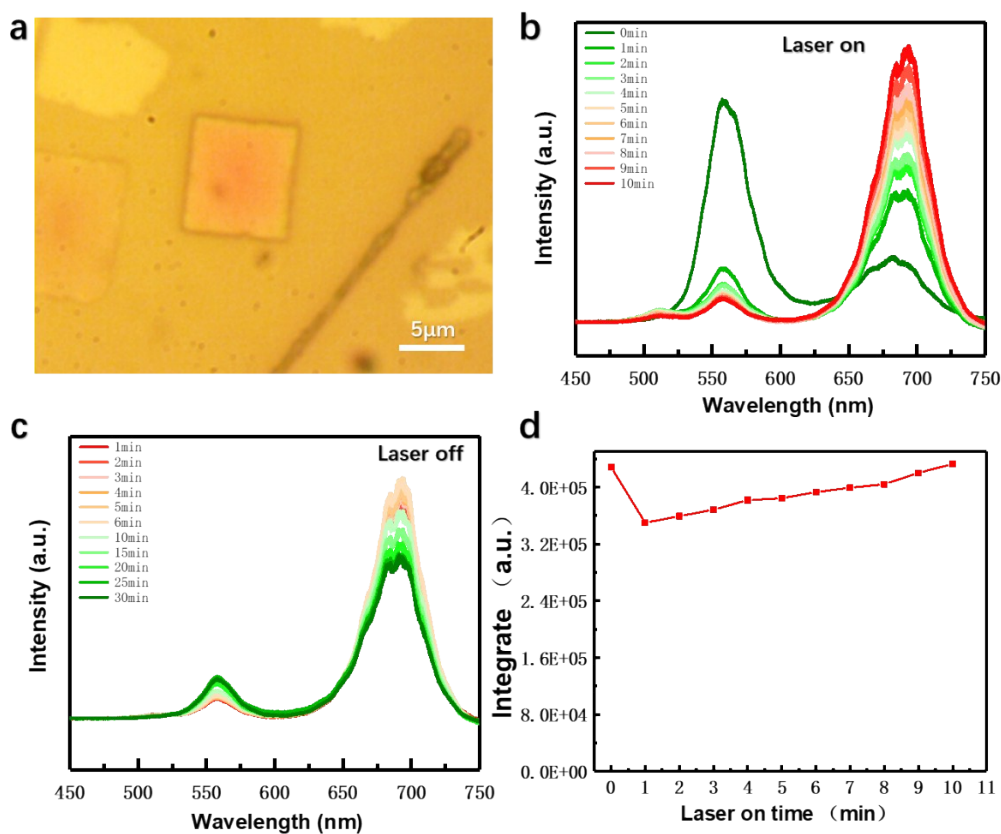

Figure S4. (a) Cubic shape individual  $\text{CsPbBr}_x\text{I}_{(3-x)}$  micro-platelet photograph which was taken from the microscope of the home-made micro-area fluorescence test system. (b) The PL spectra change for one position of individual  $\text{CsPbBr}_x\text{I}_{(3-x)}$  micro-platelet during continuous laser irradiation. (c) The PL spectra measured for the same position after the laser irradiation had been turned off. At each time point, the laser was turned on for 10s to acquire the PL spectra. (d) The integrated intensity of the PL spectrum from a wavelength of 500 nm to 750 nm.

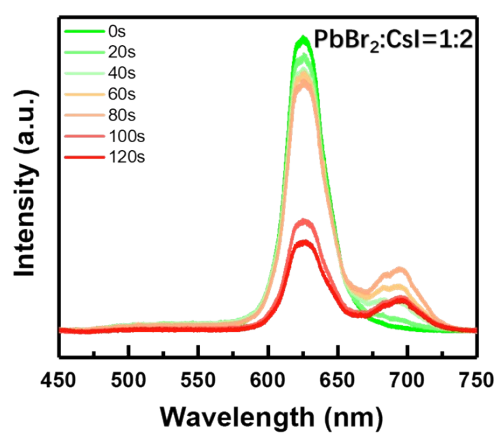

Figure S5. The PL spectra of an individual  $\text{CsPbBr}_x\text{I}_{(3-x)}$  micro-platelet fabricated by using  $\text{PbBr}_2$  and  $\text{CsI}$  precursor powder with a molar ratio of 1:2.

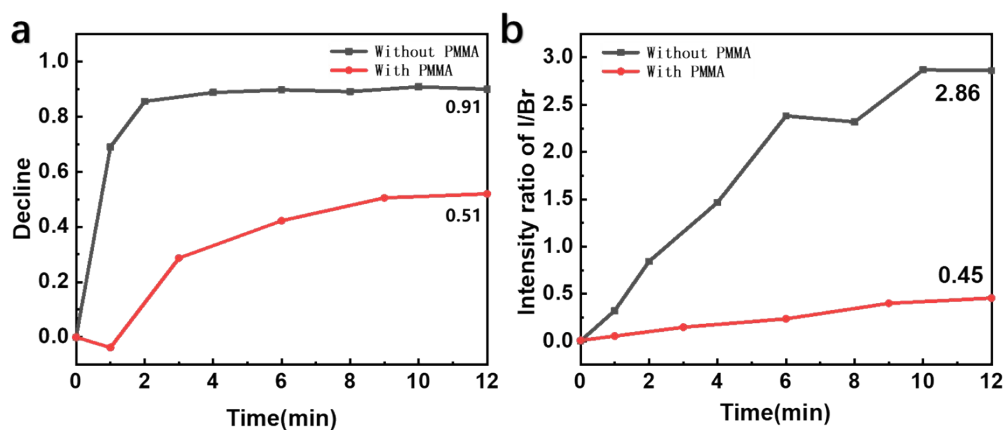

Figure S6. (a) The degree of declining of bromine-rich phase emission intensity with (red line) and without (black line) PMMA during laser irradiation. (b) PL intensity ratio of iodine-rich domain and bromine-rich domain of the CsPbBr<sub>x</sub>I<sub>(3-x)</sub> micro-platelet coated with (red line) and without (black line) PMMA.
